# Supplementary material for: Effect of controlled human Plasmodium falciparum infection on B cell subsets in individuals with different levels of malaria immunity
Source: Research Square preprint supplement (doi:10.21203/rs.3.rs-6221433/v1), 2025-04-19
Supplement: Supplementary file 1 [file d674c6a3b57596863a66b305.docx]

### SUPPLEMENTARY INFORMATION

**Effect of controlled human *Plasmodium falciparum* infection on B cell subsets in individuals with different levels of malaria immunity**

Pilar Requena1,2,3,#, Gloria Patricia Gómez-Pérez4,5, Matthew B. B. McCall4,6,7, Diana Barrios4, Ruth Aguilar4, Julia Fernández-Morata4, Marta Vidal4, Joseph J. Campo8, Carla Sanchez4, Maria Yazdabankhsh9, B. Kim Lee Sim1, Stephen L. Hoffman10, Peter Kremsner11,12, Bertrand Lell11,13, Benjamin Mordmüller7,12,14, Carlota Dobaño4,5,14*, Gemma Moncunill4,5,14,#*

1. Universidad de Granada, Departamento de Medicina Preventiva y Salud Pública, Granada, Spain.

2. Instituto de Investigación Biosanitaria de Granada (ibs.GRANADA), Granada, Spain.

3. Centro de Investigación Biomédica en Red de Epidemiología y Salud Pública (CIBERESP), Madrid, Spain.

4. ISGlobal, Barcelona, Catalonia, Spain.

5. Facultat de Medicina i Ciències de la Salut, Universitat de Barcelona, Barcelona, Spain.

6. Department of Medical Microbiology and Infectious Diseases, Erasmus MC, Rotterdam, The Netherlands.

7. Department of Medical Microbiology, Radboud Center for Infectious Diseases, Radboud University Medical Center, Geert Grooteplein Zuid 28, 6525 GA, Nijmegen, The Netherlands.

8. Antigen Discovery, Irvine, CA, USA

9. Leiden University Center for Infectious Diseases (LUCID), Leiden University Medical Center, ZA, Leiden, Netherlands.

10. Sanaria Inc., Rockville, MD, USA.

11. Centre de Recherches Médicales de Lambaréné (CERMEL), Gabon.

12. Institute of Tropical Medicine and German Center for Infection Research, University of Tübingen, Tübingen, Germany.

13. Department of Medicine I, Division of Infectious Diseases and Tropical Medicine, Medical University of Vienna, Vienna, Austria.

14. CIBER de Enfermedades Infecciosas (CIBERINFEC), Barcelona, Spain.

*shared

# Correspondence:

Pilar Requena, Facultad de Farmacia, Departamento de Medicina Preventiva y Salud Pública. Campus de Cartuja s/n 18170, Granada (Spain). ORCID: 0000-0002-2298-4085

Email: prequena@ugr.es

Gemma Moncunill, ISGlobal, C/Rosselló, 132, 08036 Barcelona (Spain). ORCID: 0000-0001-5105-9836

Email: gemma.moncunill@isglobal.org

### Supplementary Table 1. Antibodies used in the multiparameter flow cytometry panel

| **Antibody** | **Fluorocrome** | **Company** | **Cat. No.** | **Clone** |
| --- | --- | --- | --- | --- |
| anti-CD3 | Horizon v500 | BD | 561416 | UCHT1 |
| anti-CD16 | Horizon v500 | BD | 561394 | 3G8 |
| anti-CD14 | Horizon v500 | BD | 561391 | M5e2 |
| anti-CD19 | PE/CF594 | BD | 562321 | HIB19 |
| anti-IgD | APC/H7 | BD | 561305 | IA6-2 |
| anti-CD27 | APC | BD | 558664 | M-T271 |
| anti-CD21 | FITC | Beckman Coulter | PN IM0473U | BL13 |
| anti-CD38 | PerCP | BioLegend | 303520 | HIT2 |
| anti-CD10 | BV421 | BioLegend | 312217 | HI10a |
| anti-surface IgM | PE | BD | 555783 | G20-127 |
| anti-surface IgG | PE/Cy7 | BD | 561298 | G18-145 |
| anti-PD1 | BV605 | BioLegend | 329923 | EH12.2H7 |
| anti-CD1c | AF700 | BioLegend | 331530 | L161 |

**Supplementary Figures**

**A**

**B**

**Figure S1. Spearman’s correlation matrices of frequencies of B cell subpopulations and B cells expressing IgG, PD1 and CD1c markers and anti-Pf antibody levels in all individuals**. The matrices represent the correlations of these immune variables measured in blood of semi-immune (LACHMI-001), vaccinated (TÜCHMI-002), and naïve (TÜCHMI-001) individuals, collected before the CHMI (A) or at all timepoints together (B). Colour of the cells represent the Spearman’s rho value, ranging from -1 to +1. * p<0.05, ** p<0.01, *** p<0.001.

**A**

**B**

**Figure S2. Spearman’s correlation matrices of anti-Pf antibody and cytokine levels in all individuals**. The matrices represent the correlations of these immune variables measured in blood of semi-immune (LACHMI-001), vaccinated (TÜCHMI-002), and naïve (TÜCHMI-001) individuals, collected before the CHMI (A) or at all timepoints together (B). Colour of the cells represent the Spearman’s rho value, ranging from -1 to +1. * p<0.05, ** p<0.01, *** p<0.001.

**A**

**B**

**Figure S3. Spearman’s correlation matrices of frequencies of B cell subsets expressing IgG, PD1 and CD1c markers and cytokine concentrations in all individuals**. The matrices represent the correlations of these immune variables measured in blood of semi-immune (LACHMI-001), vaccinated (TÜCHMI-002), and naïve (TÜCHMI-001) individuals, collected before the CHMI (A) or at all timepoints together (B). Colour of the cells represent the Spearman’s rho value, ranging from -1 to +1. * p<0.05, ** p<0.01, *** p<0.001.

**A**

**B**

**Figure S4. Spearman’s correlation matrices of frequencies of B cell subsets expressing IgG, PD1 and CD1c markers and cytokine concentrations in semi-immune individuals**. The matrices represent the correlations of these immune variables measured in blood of semi-immune (LACHMI-001) individuals, collected before the CHMI (A) or at all timepoints together (B). Colour of the cells represent the Spearman’s rho value, ranging from -1 to +1. * p<0.05, ** p<0.01, *** p<0.001.
